# Supplementary material for: Click Chemistry of Melamine Dendrimers: Comparison of “Click-and-Grow” and “Grow-Then-Click” Strategies Using a Divergent Route to Diversity
Source: MDPI journal article supplement (doi:10.3390/molecules28010131), 2022-12-23

# Supporting Information

Click Chemistry of Melamine Dendrimers: Comparison of "Click-and-Grow" and  
"Grow-then-Click" Strategies Using a Divergent Route to Diversity

Sanami Numai <sup>1</sup>, Risako Yoto <sup>1</sup>, Masataka Kimura <sup>1</sup>, Eric E. Simanek <sup>2</sup>, and Yoshikazu Kitano <sup>1,\*</sup>

<sup>1</sup>Laboratory of Bio-organic Chemistry, Tokyo University of Agriculture and Technology, 3-5-8  
Saiwai-cho, Fuchu-shi, Tokyo 183-8509, Japan, e-mail: kitayo@cc.tuat.ac.jp; Tel.: +81-42-367-5700

<sup>2</sup>Department of Chemistry & Biochemistry, Texas Christian University, Fort Worth, TX 76129, USA

## Table of Contents

## Page

|                                                                                  |     |
|----------------------------------------------------------------------------------|-----|
| 1. $^1\text{H}$ and $^{13}\text{C}$ NMR spectral data of G1 dendrimer <b>3</b>   | S2  |
| 2. $^1\text{H}$ and $^{13}\text{C}$ NMR spectral data of G1 dendrimer <b>4</b>   | S3  |
| 3. $^1\text{H}$ and $^{13}\text{C}$ NMR spectral data of G1 dendrimer <b>5</b>   | S4  |
| 4. $^1\text{H}$ and $^{13}\text{C}$ NMR spectral data of G2 dendrimer <b>6</b>   | S5  |
| 5. $^1\text{H}$ and $^{13}\text{C}$ NMR spectral data of G2 dendrimer <b>7</b>   | S6  |
| 6. $^1\text{H}$ and $^{13}\text{C}$ NMR spectral data of G2 dendrimer <b>8</b>   | S7  |
| 7. $^1\text{H}$ and $^{13}\text{C}$ NMR spectral data of G3 dendrimer <b>9</b>   | S8  |
| 8. $^1\text{H}$ and $^{13}\text{C}$ NMR spectral data of G3 dendrimer <b>10</b>  | S9  |
| 9. $^1\text{H}$ and $^{13}\text{C}$ NMR spectral data of G1 dendrimer <b>11</b>  | S10 |
| 10. $^1\text{H}$ and $^{13}\text{C}$ NMR spectral data of G2 dendrimer <b>12</b> | S11 |
| 11. $^1\text{H}$ and $^{13}\text{C}$ NMR spectral data of G2 dendrimer <b>13</b> | S12 |
| 12. $^1\text{H}$ and $^{13}\text{C}$ NMR spectral data of <b>15</b>              | S13 |
| 13. $^1\text{H}$ and $^{13}\text{C}$ NMR spectral data of <b>16</b>              | S14 |
| 14. $^1\text{H}$ and $^{13}\text{C}$ NMR spectral data of <b>17</b>              | S15 |
| 15. $^1\text{H}$ and $^{13}\text{C}$ NMR spectral data of G3 dendrimer <b>18</b> | S16 |

# G1 dendrimer 3

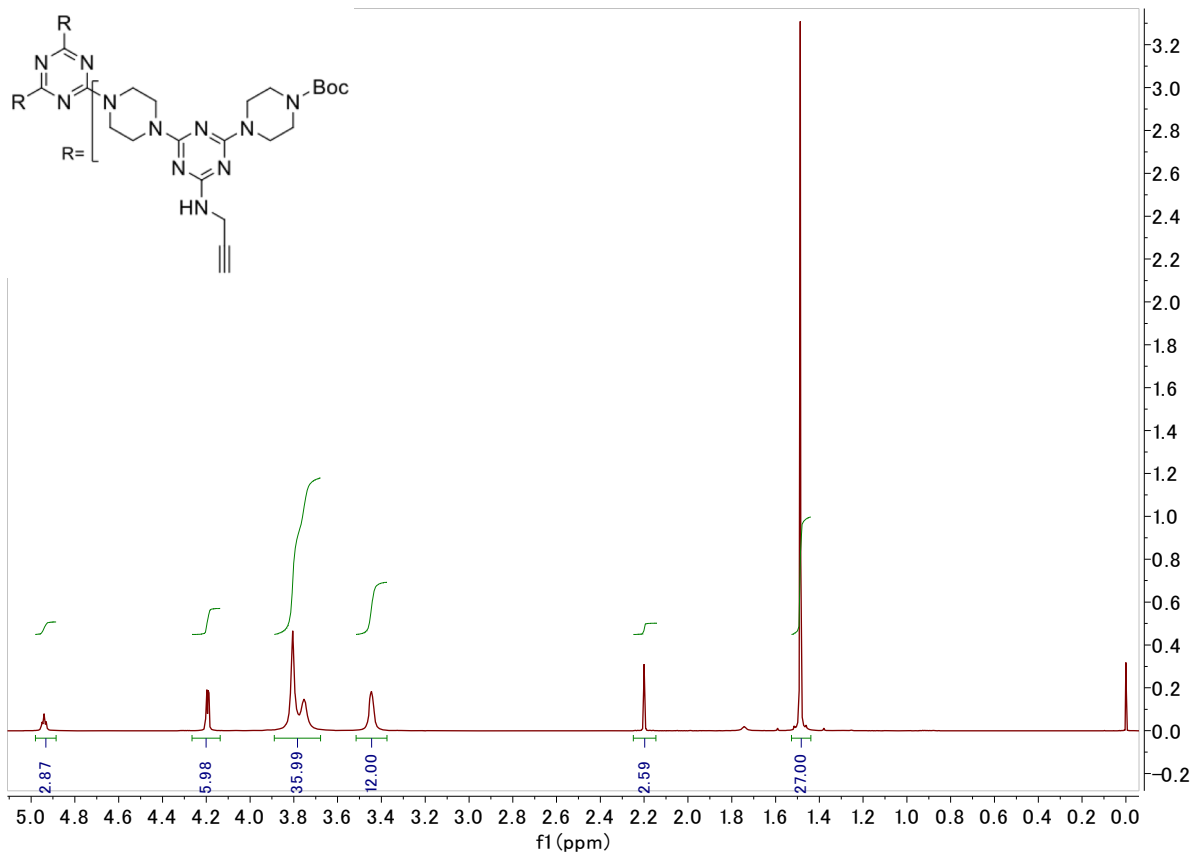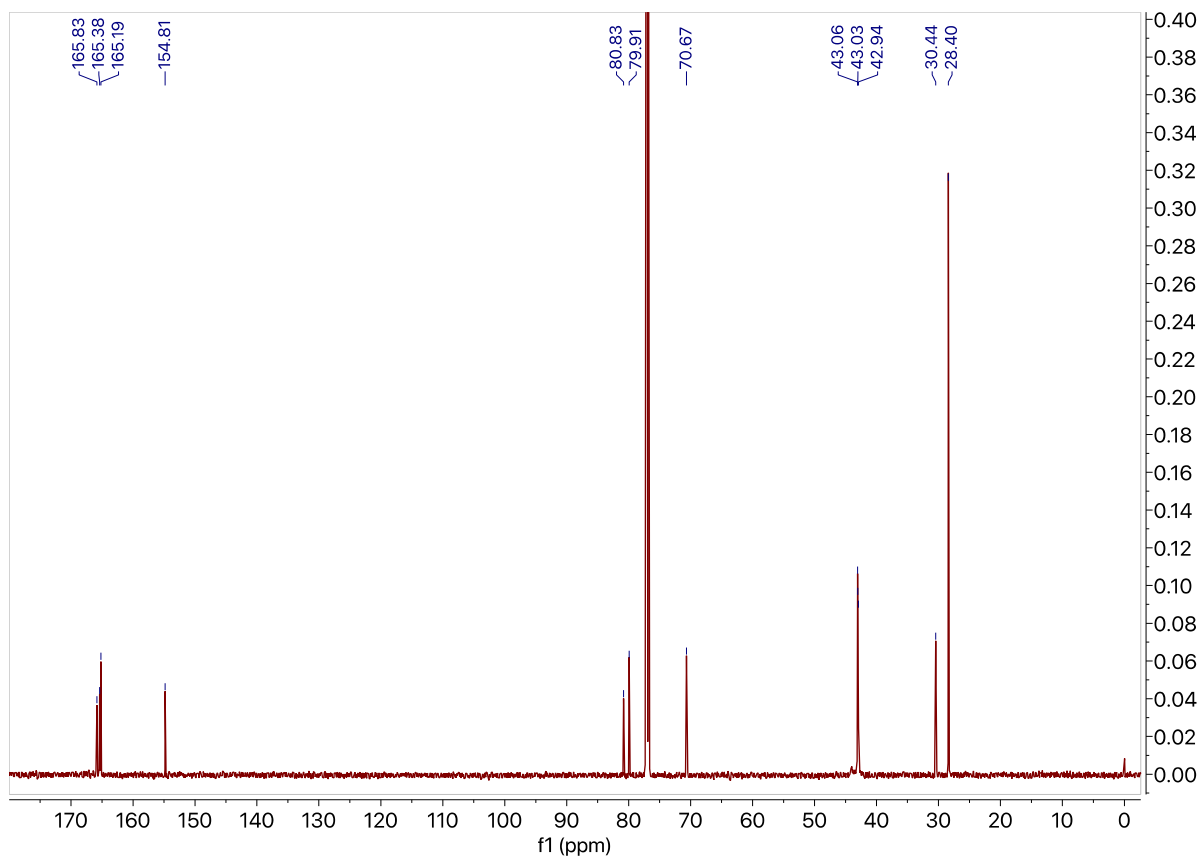

# G1 dendrimer 4

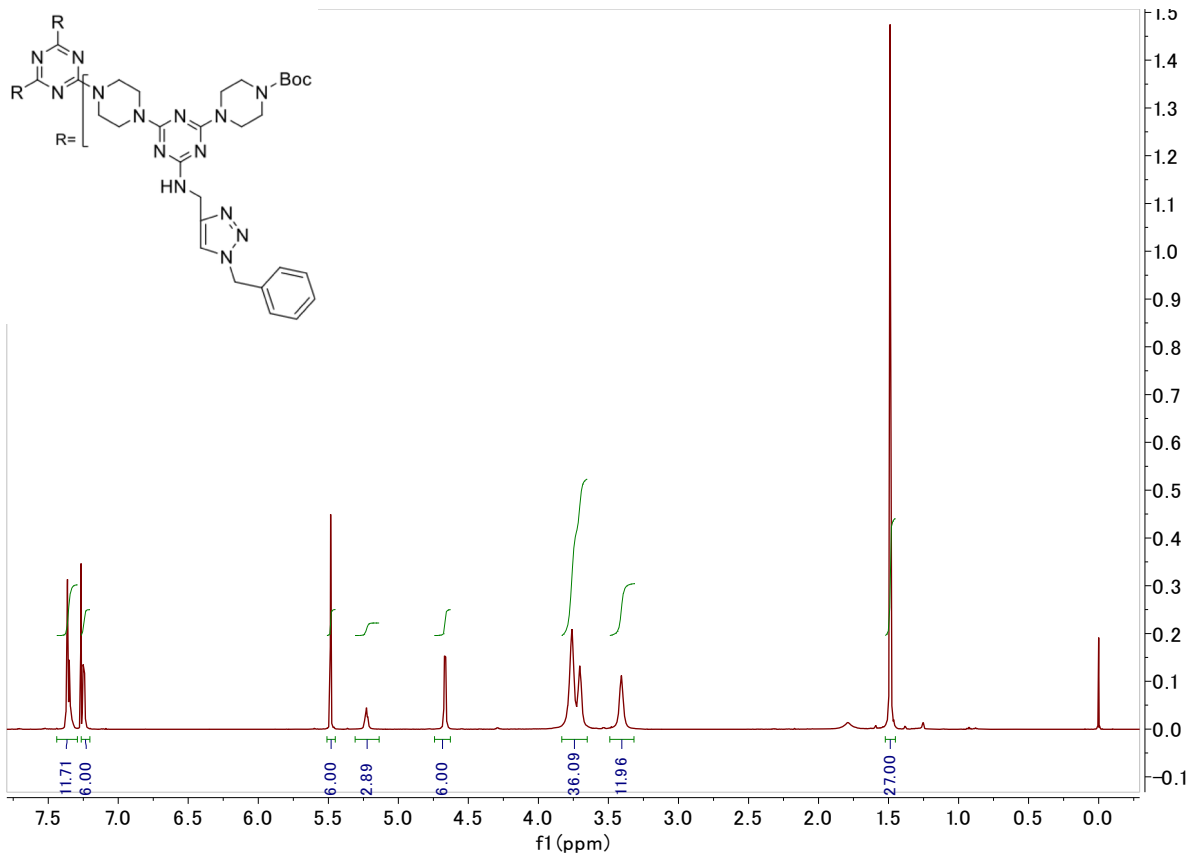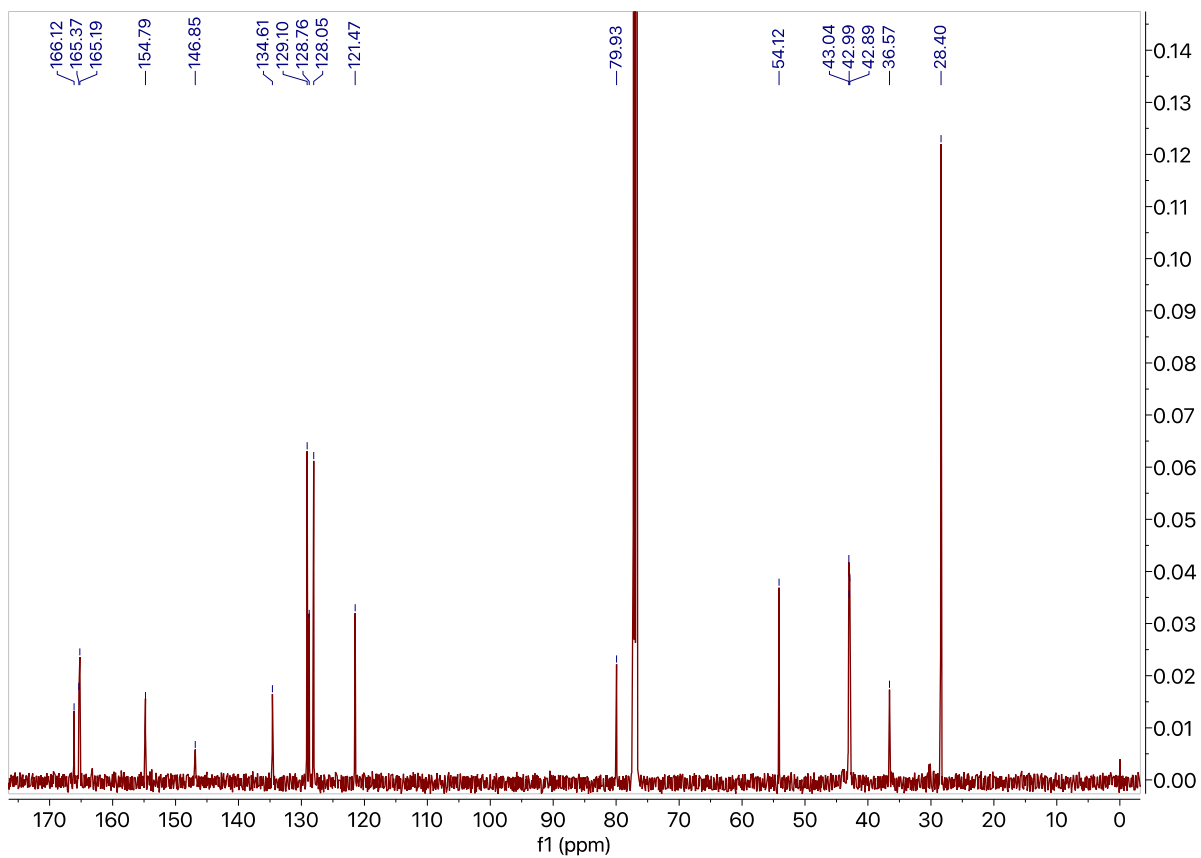

# G1 dendrimer 5

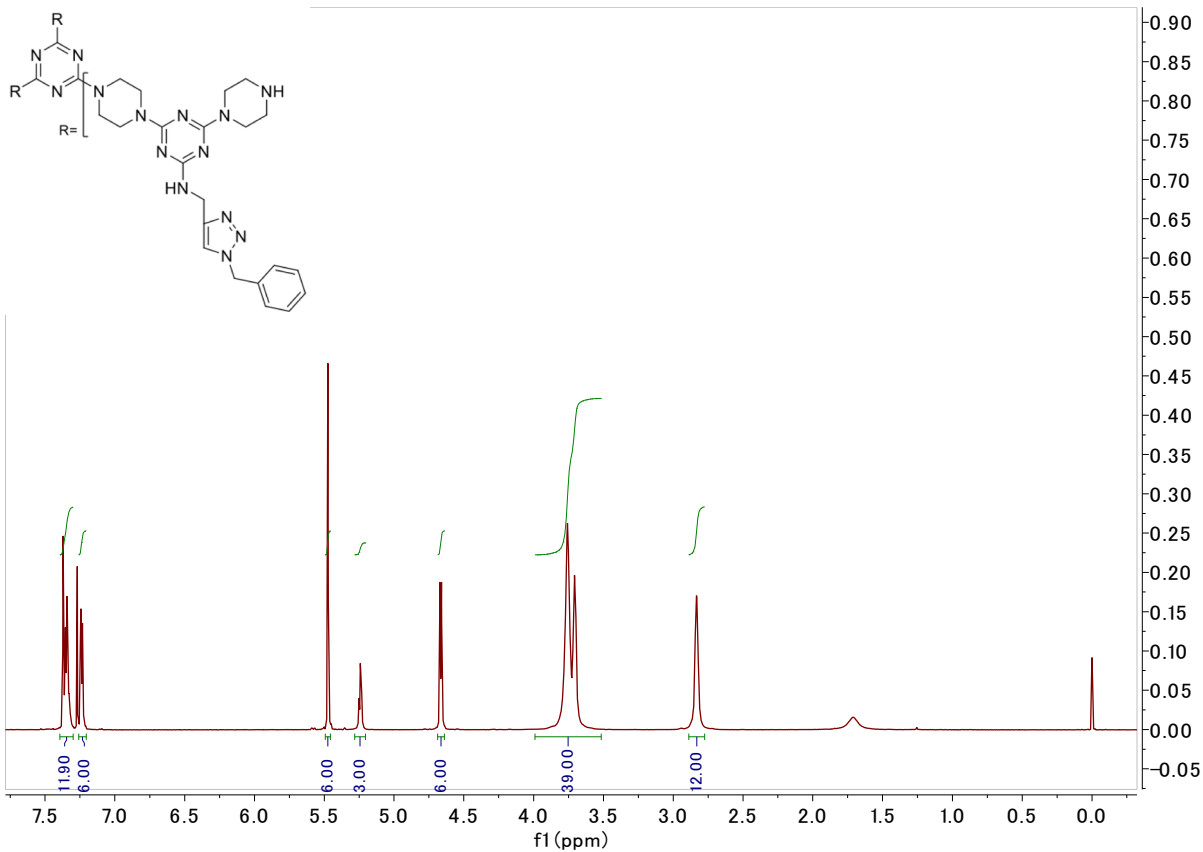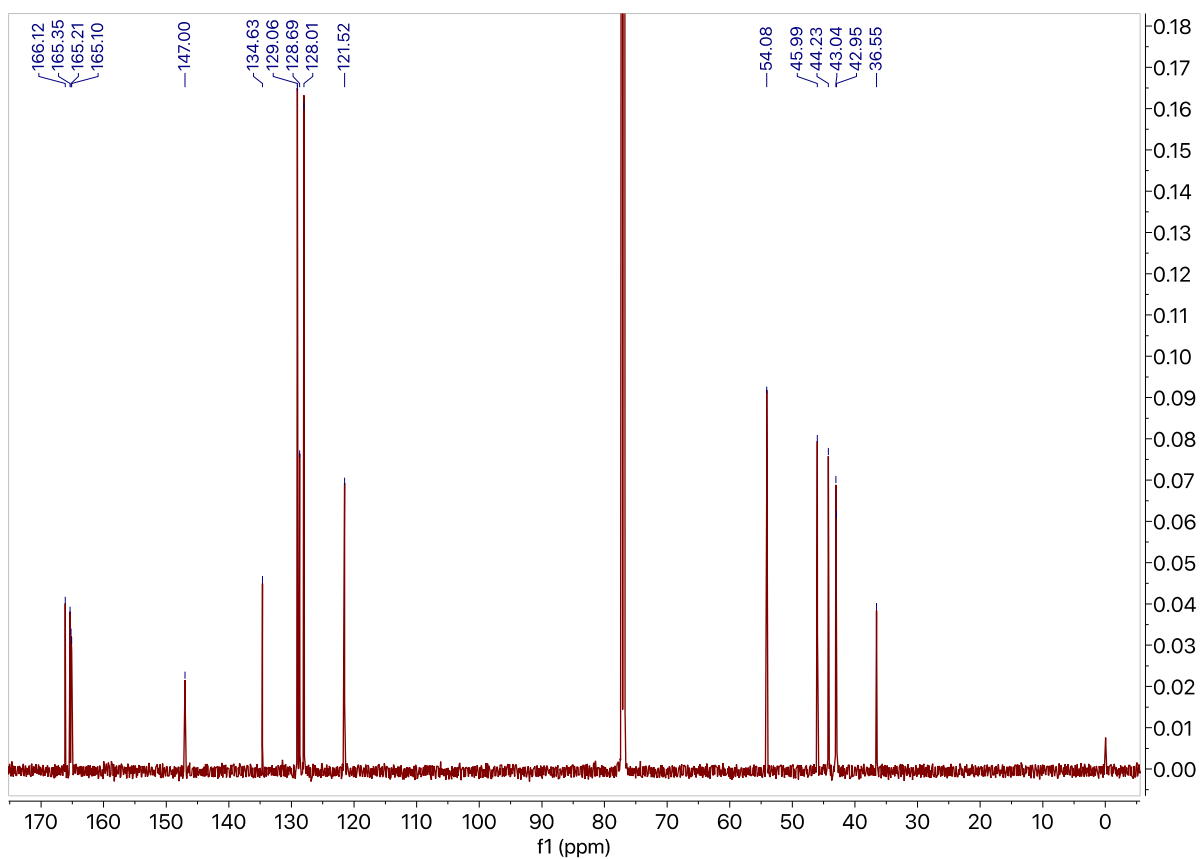

# G2 dendrimer 6

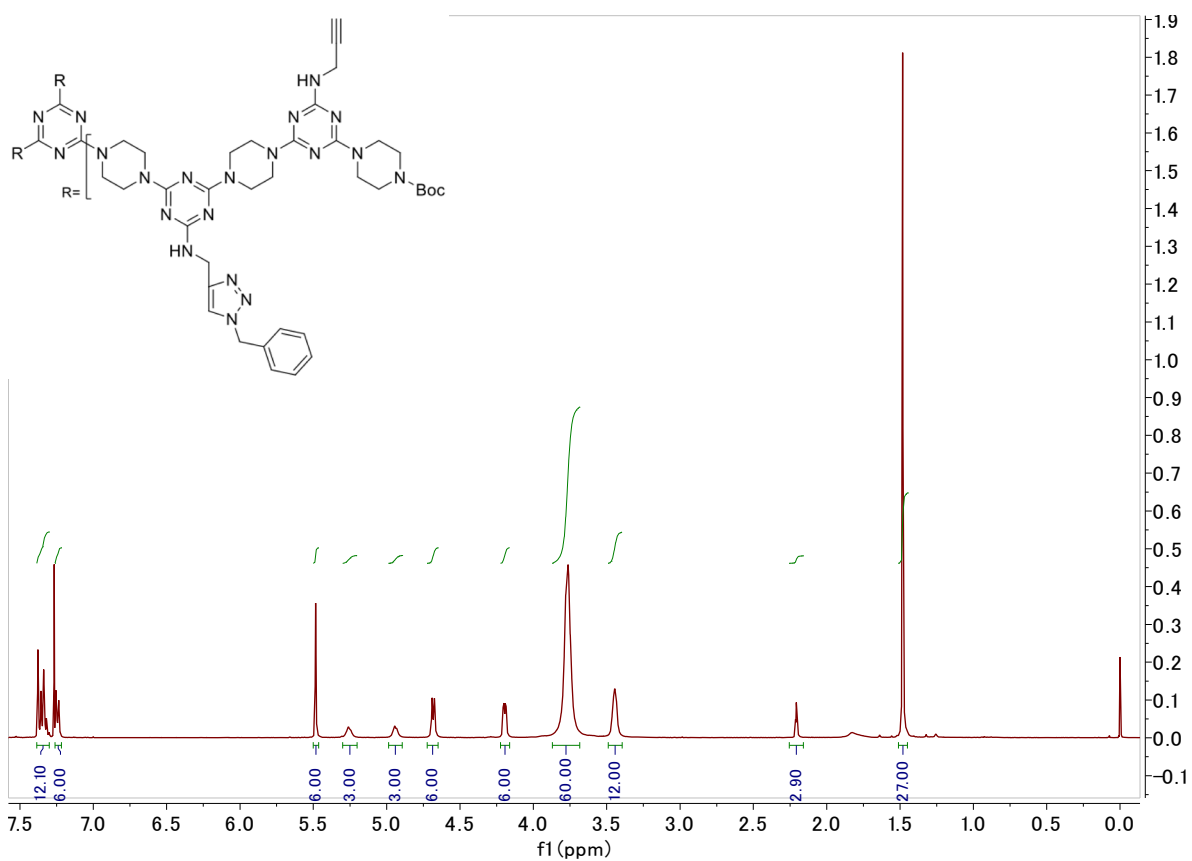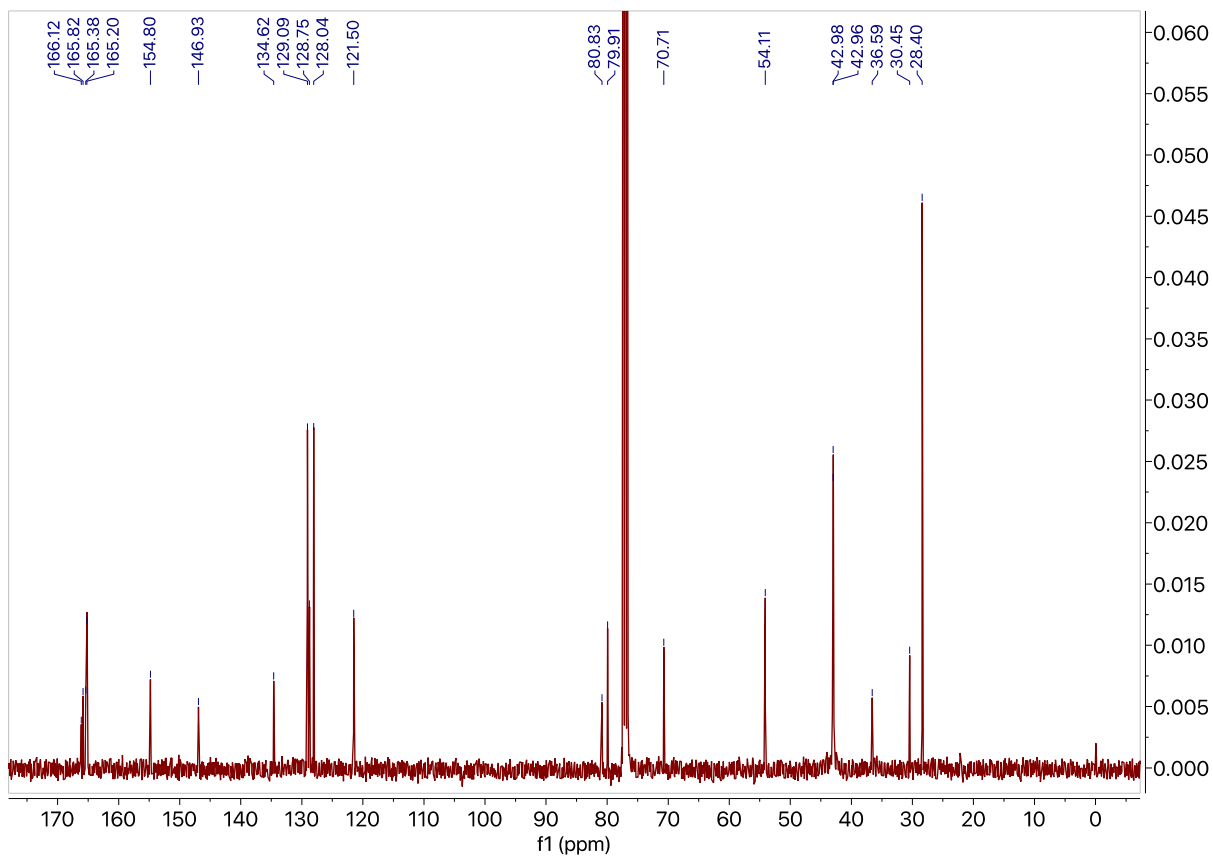

# G2 dendrimer 7

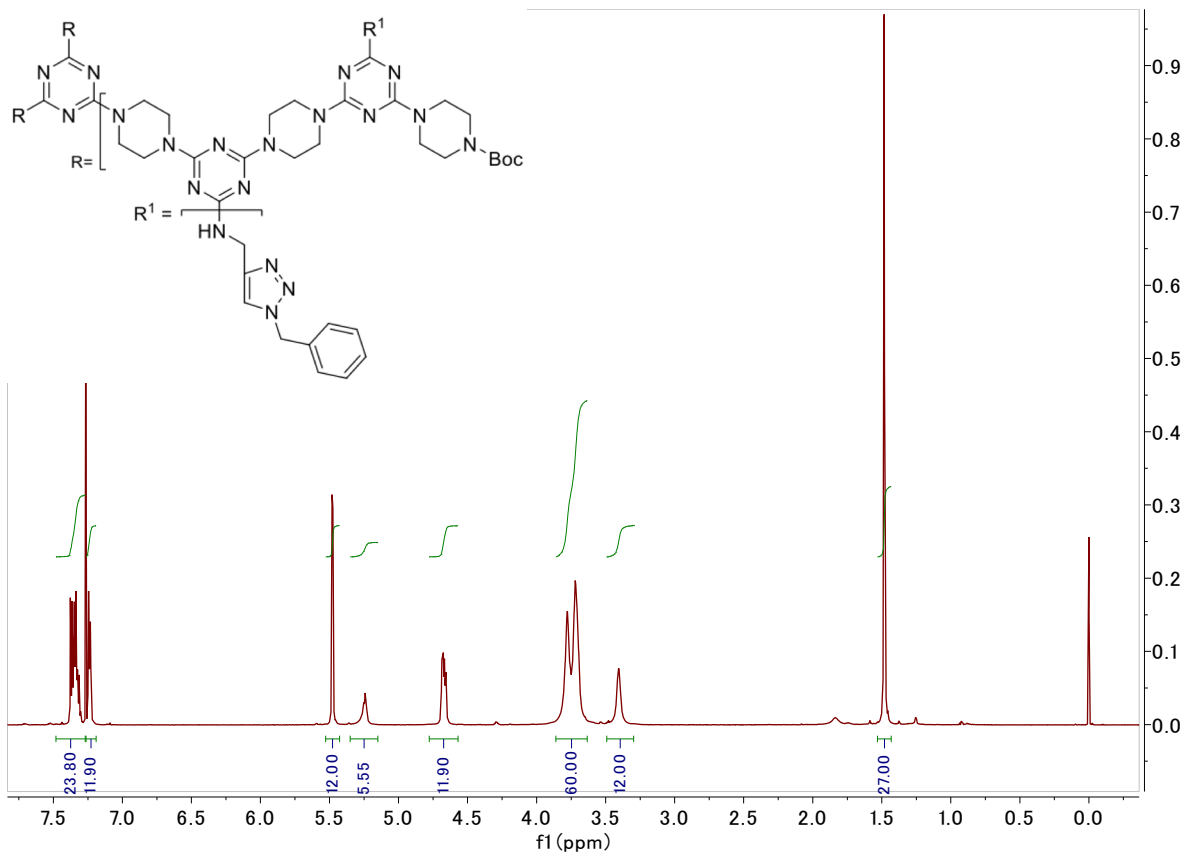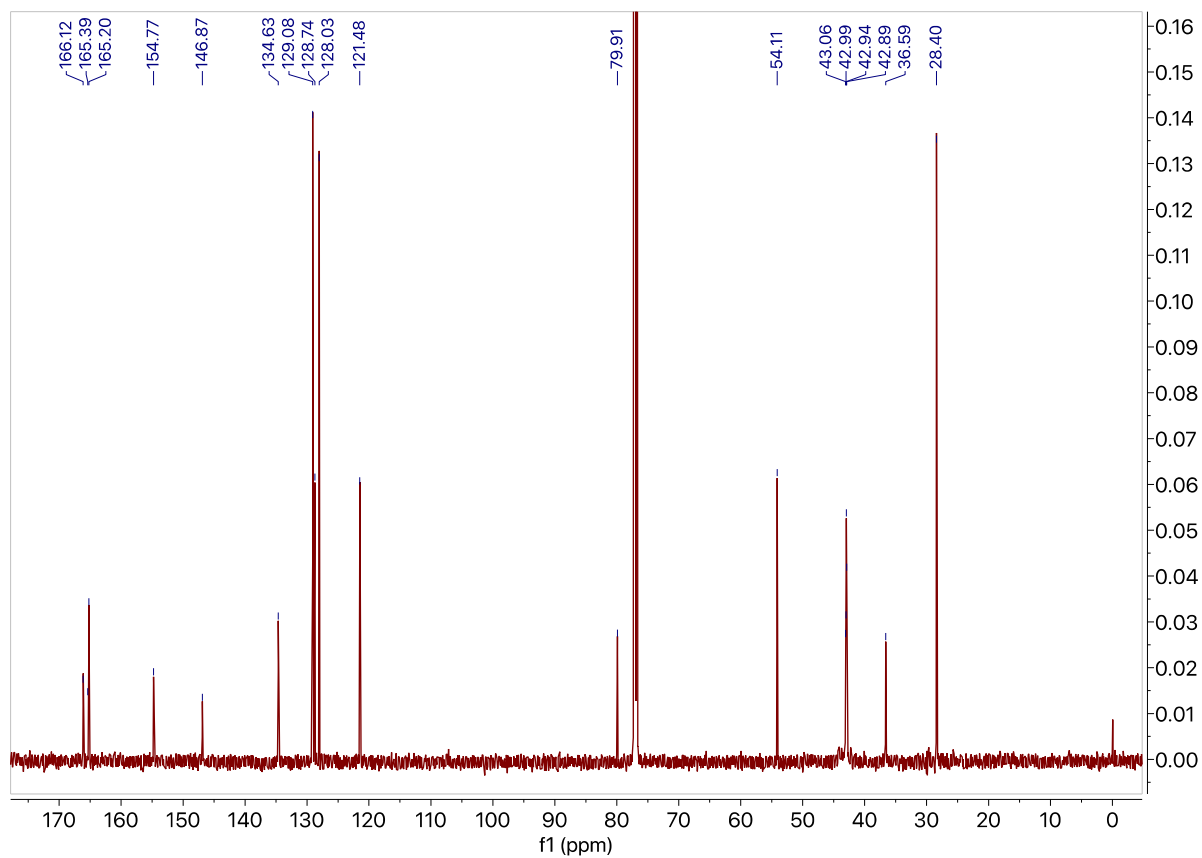

# G2 dendrimer 8

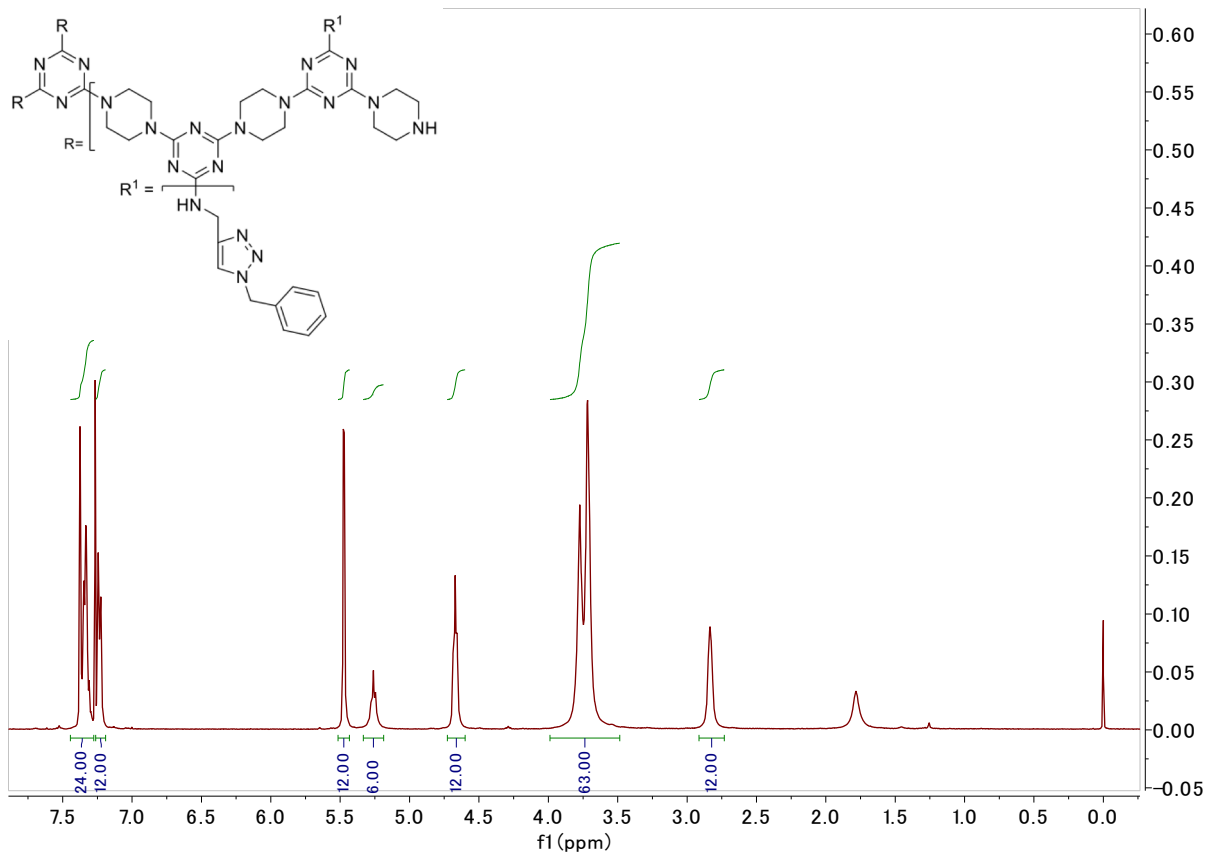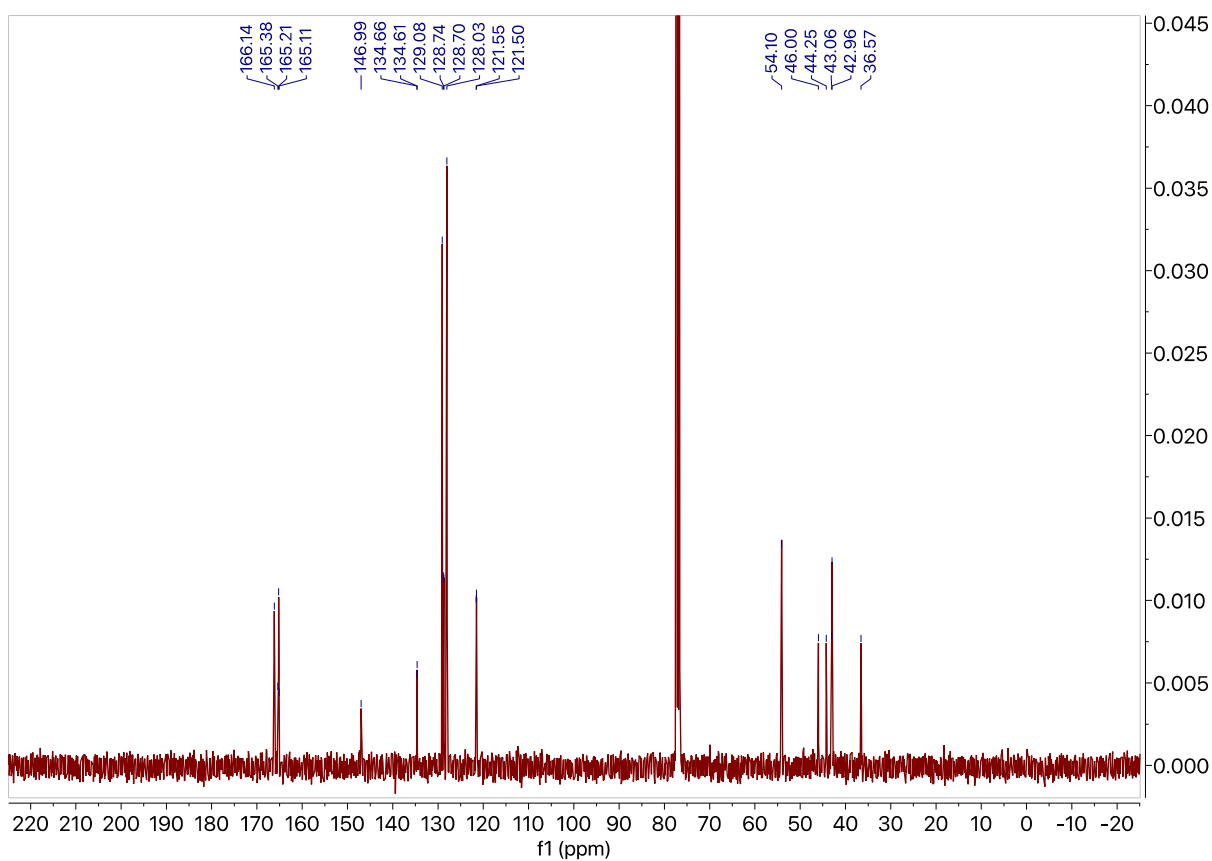



# G3 dendrimer 9

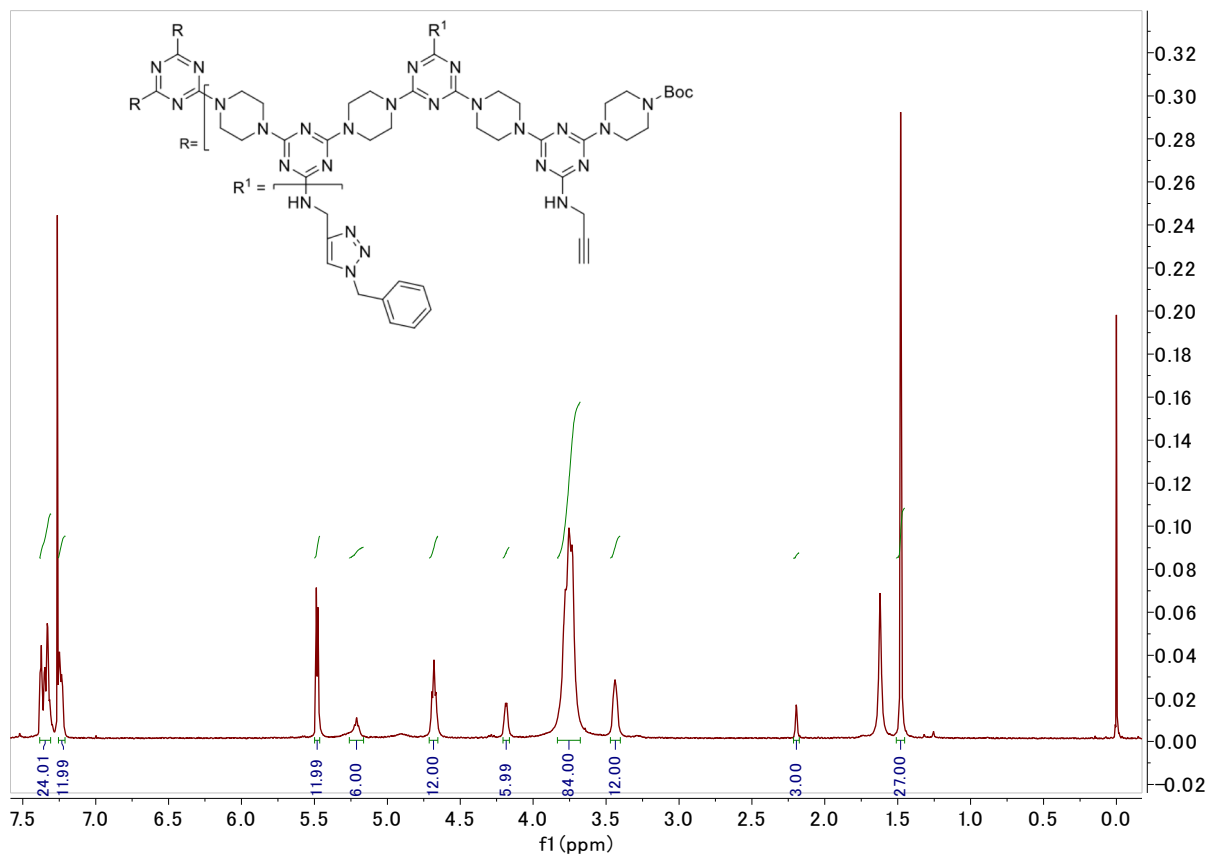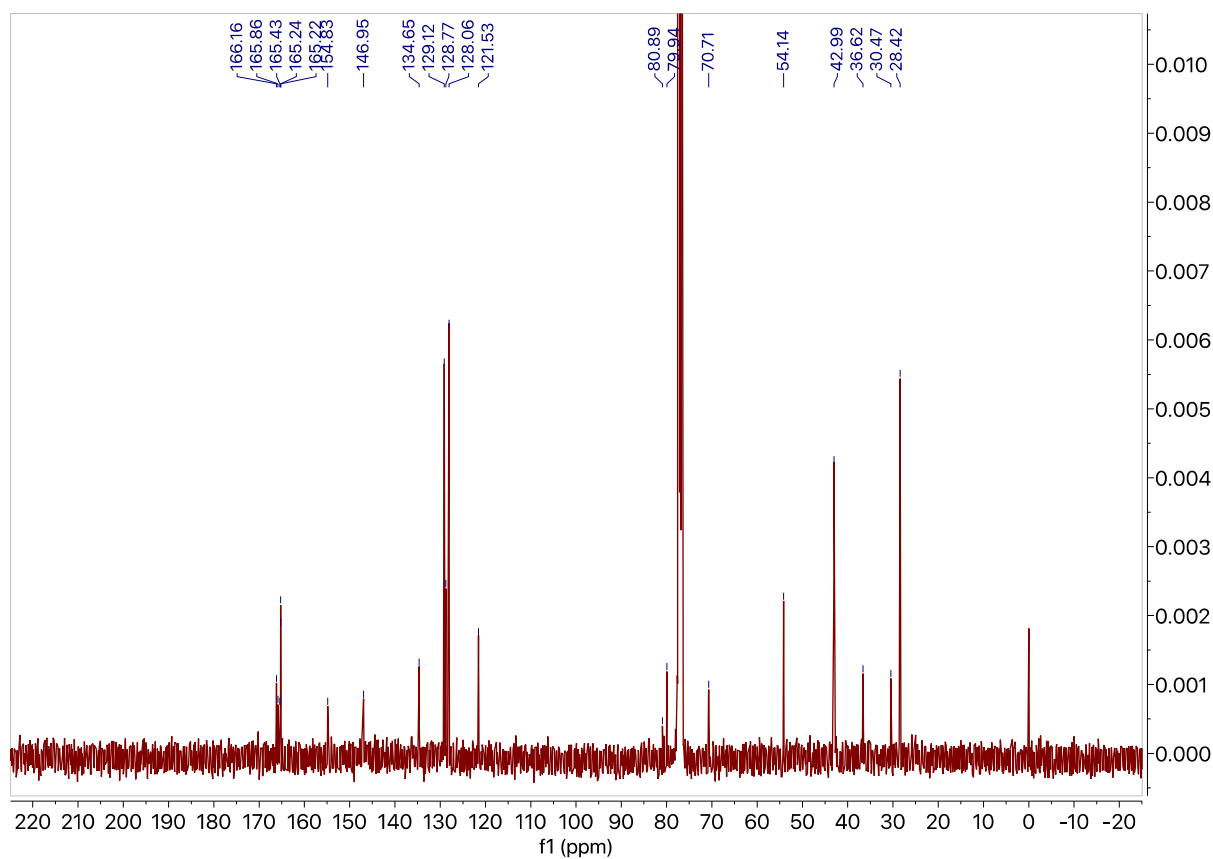

# G3 dendrimer 10

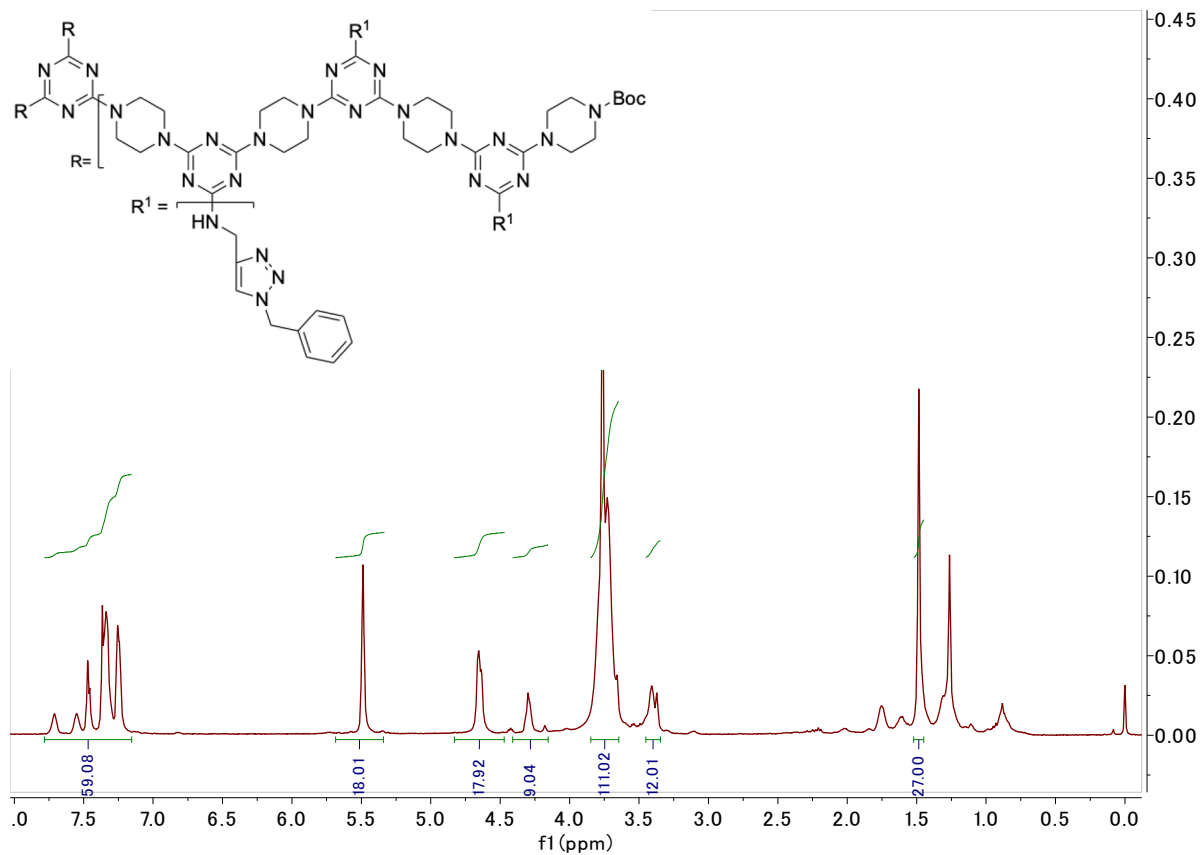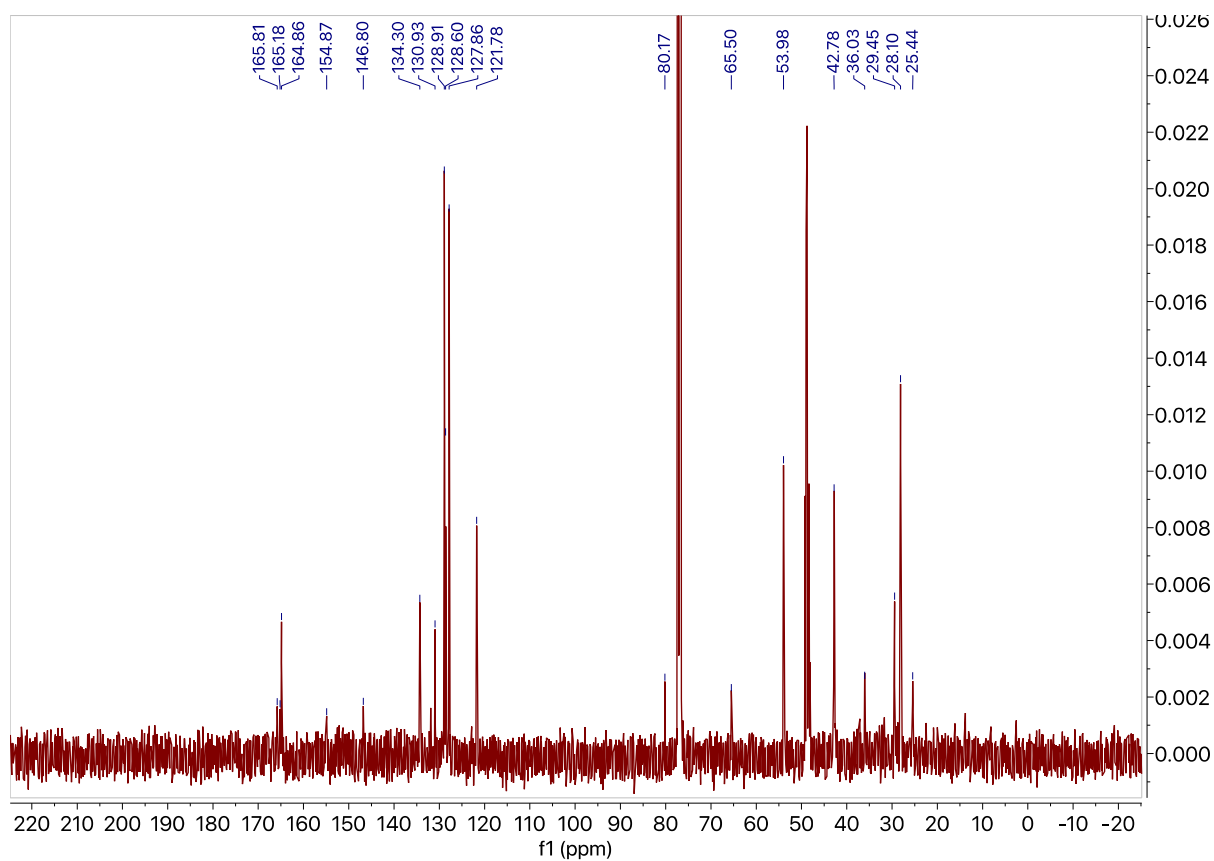

# G1 dendrimer 11

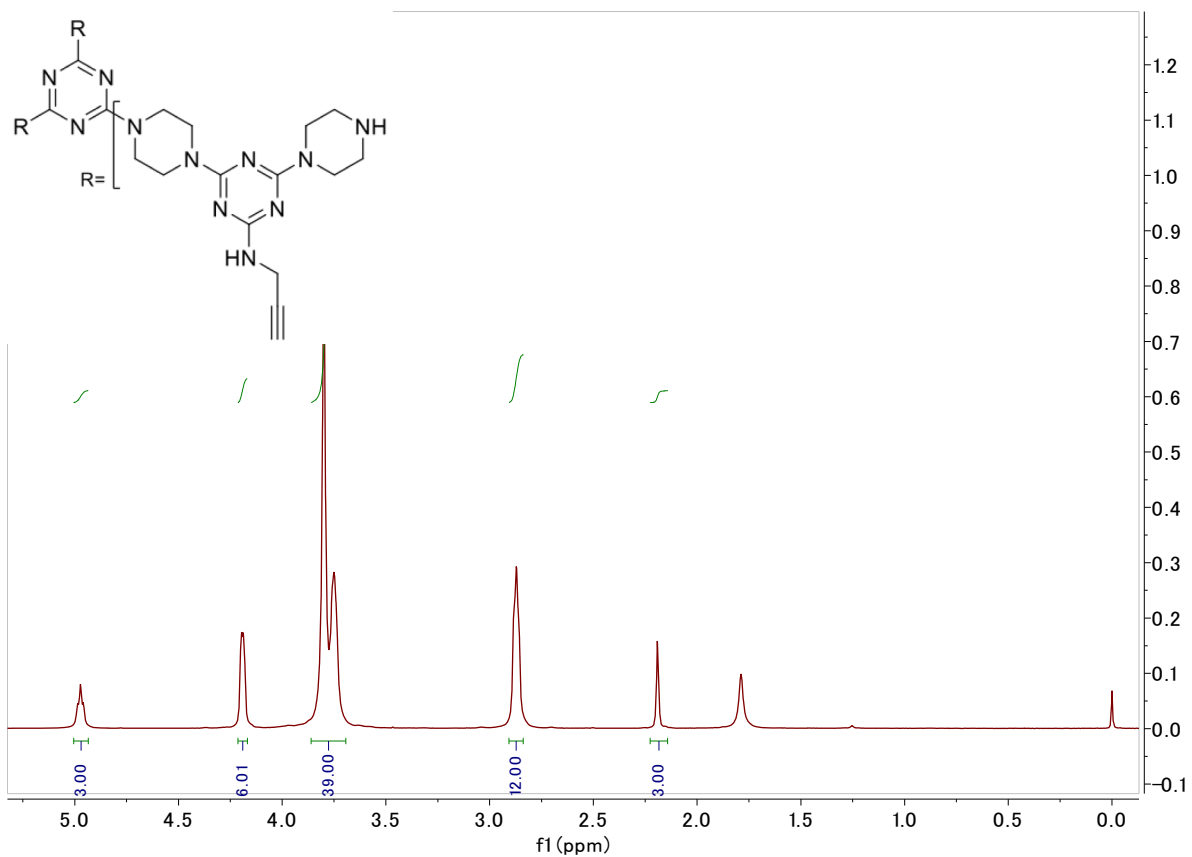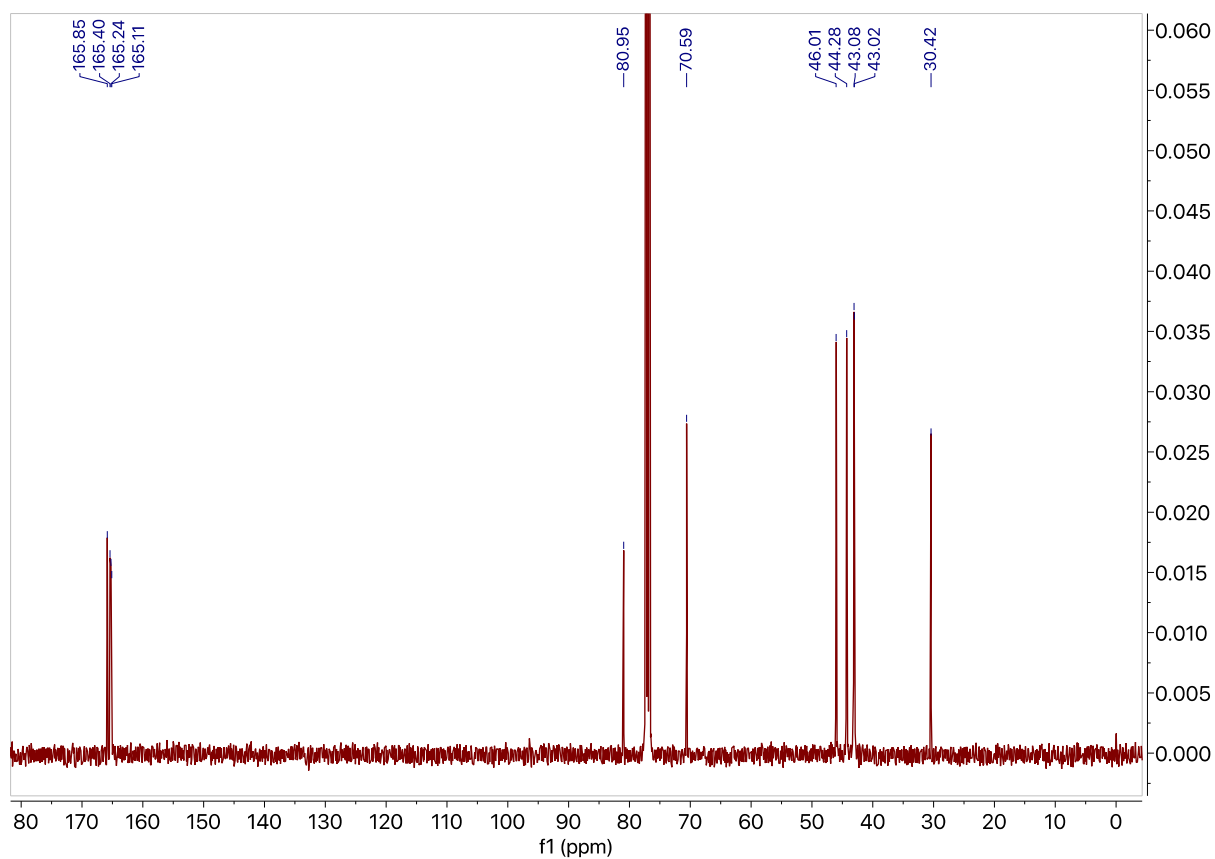

# G2 dendrimer 12

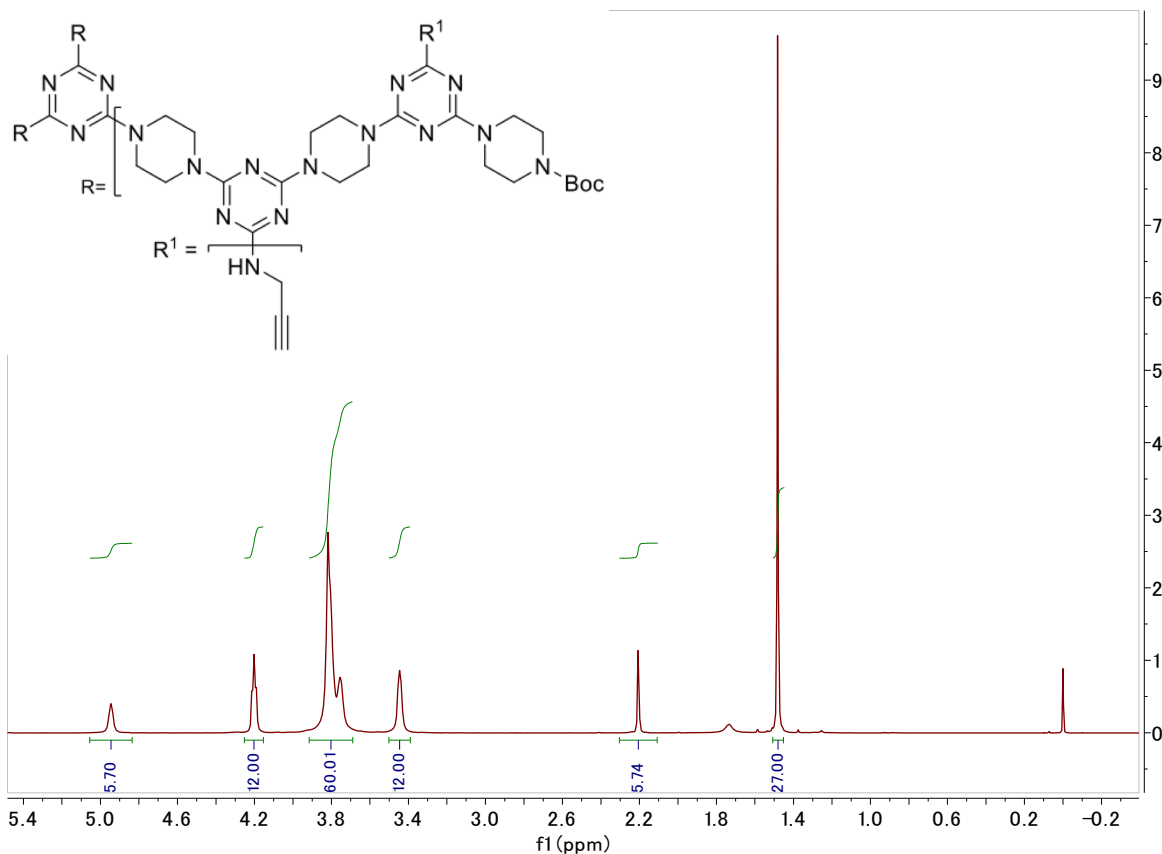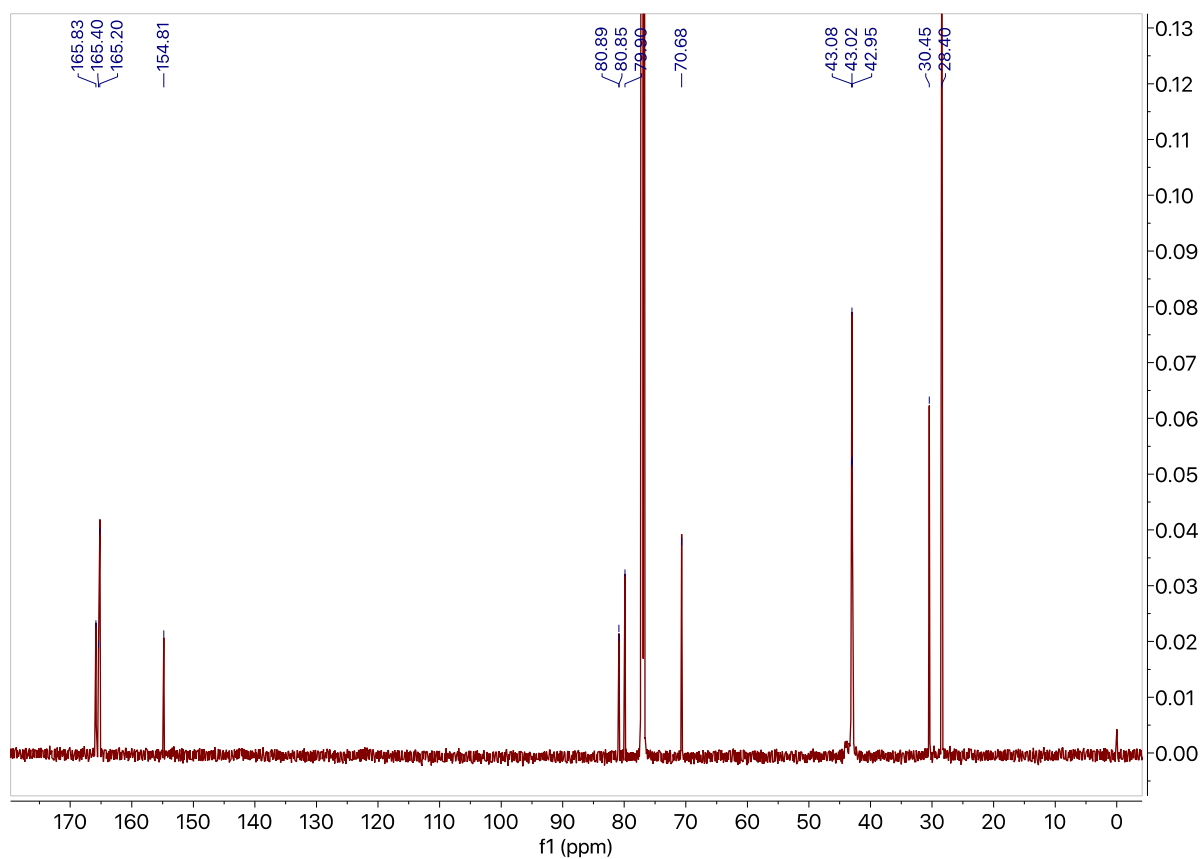

# G2 dendrimer 13

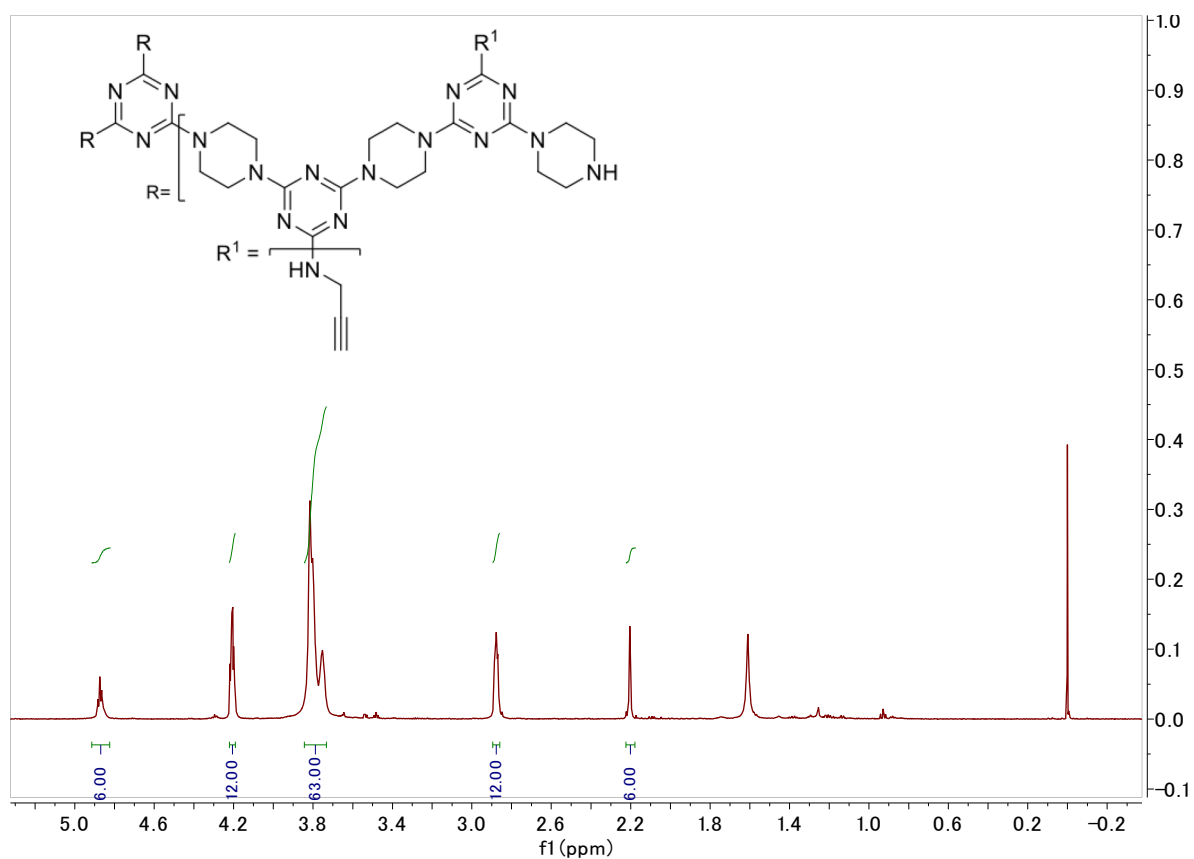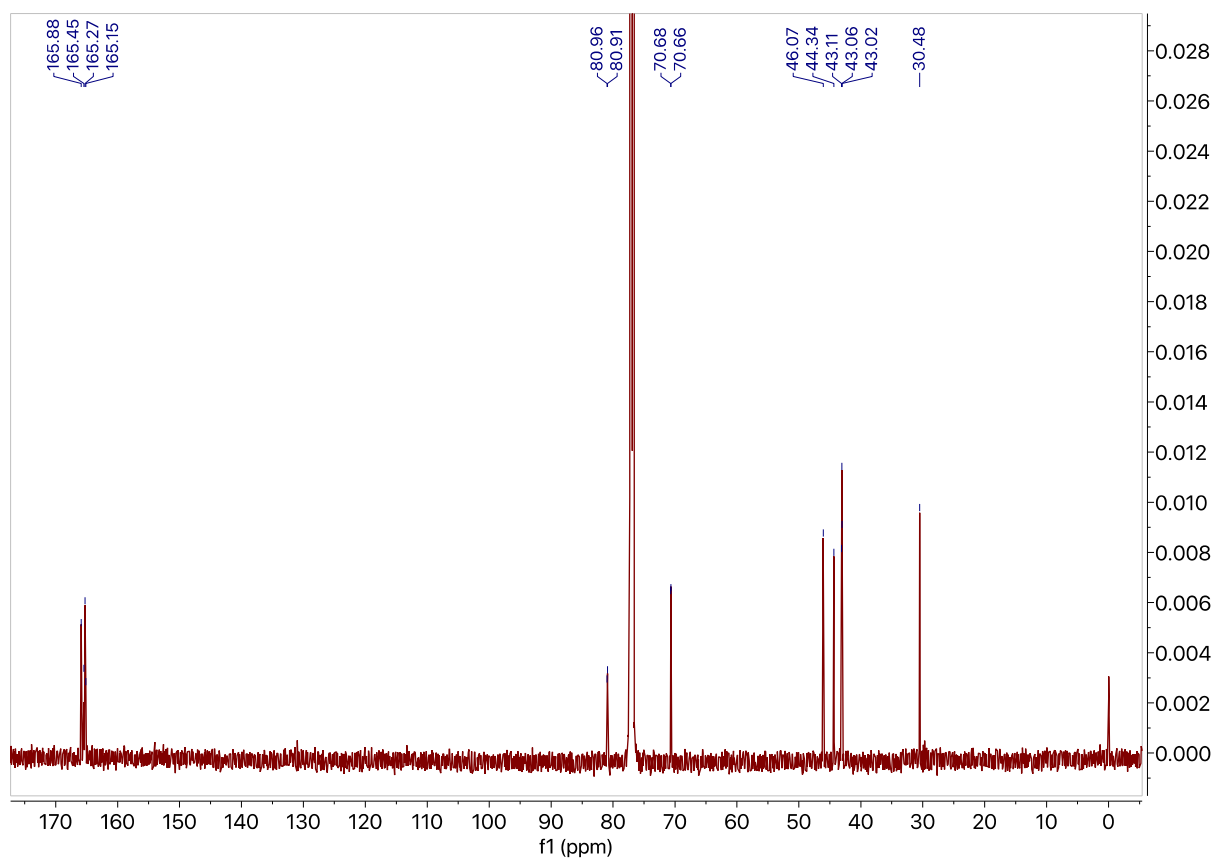

# Compound 15

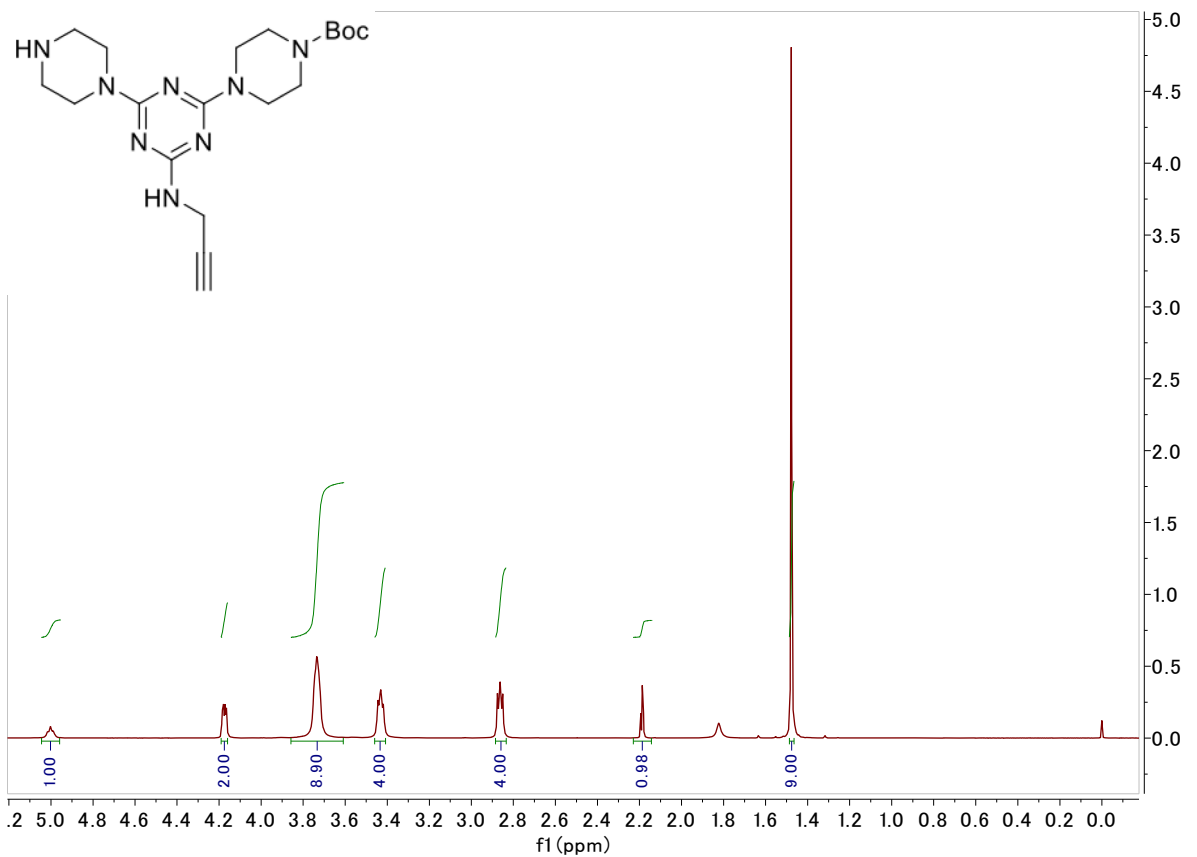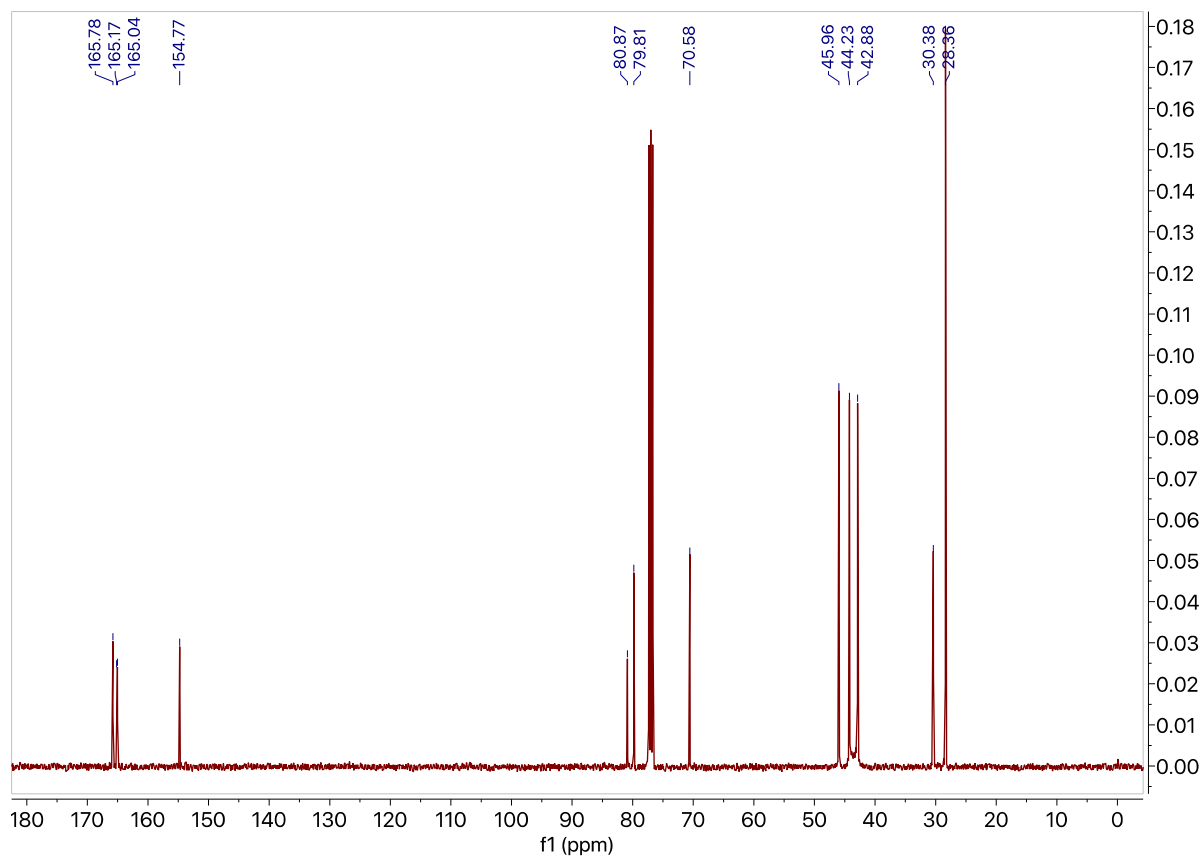

# Compound 16

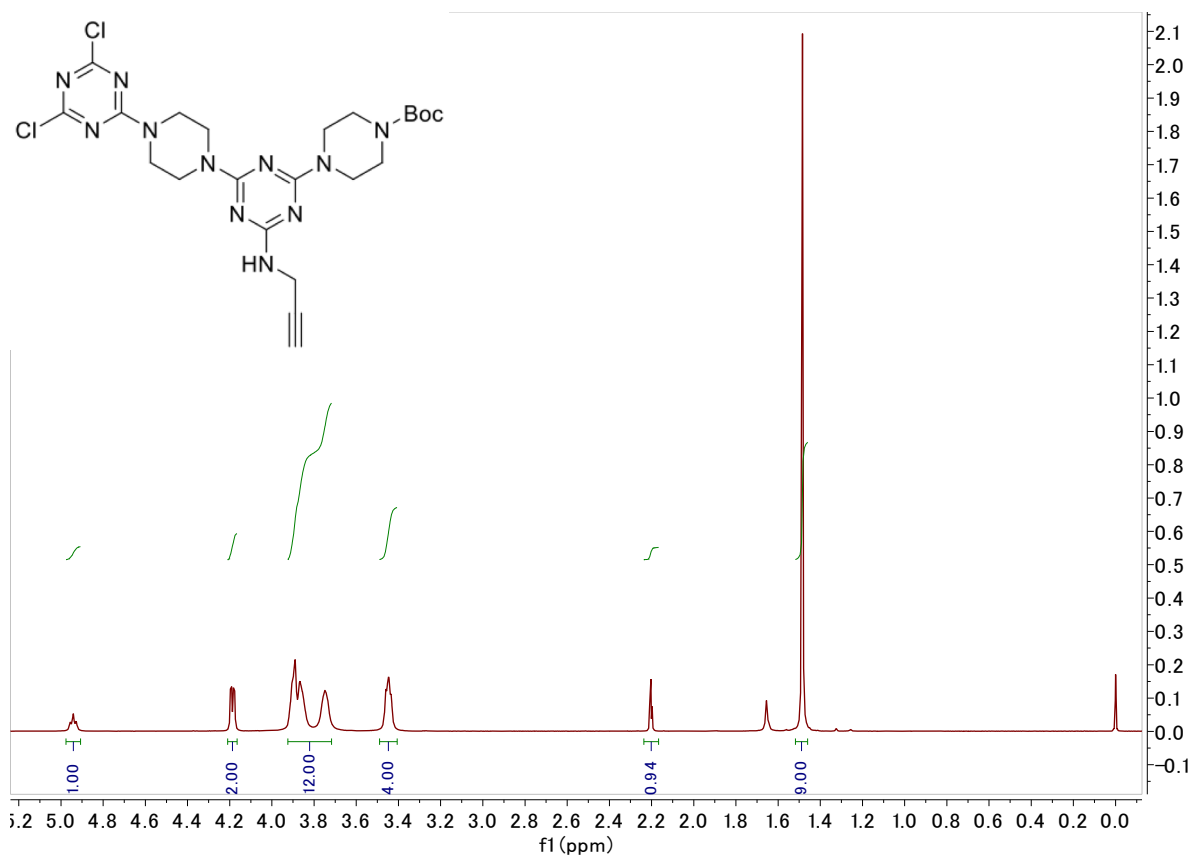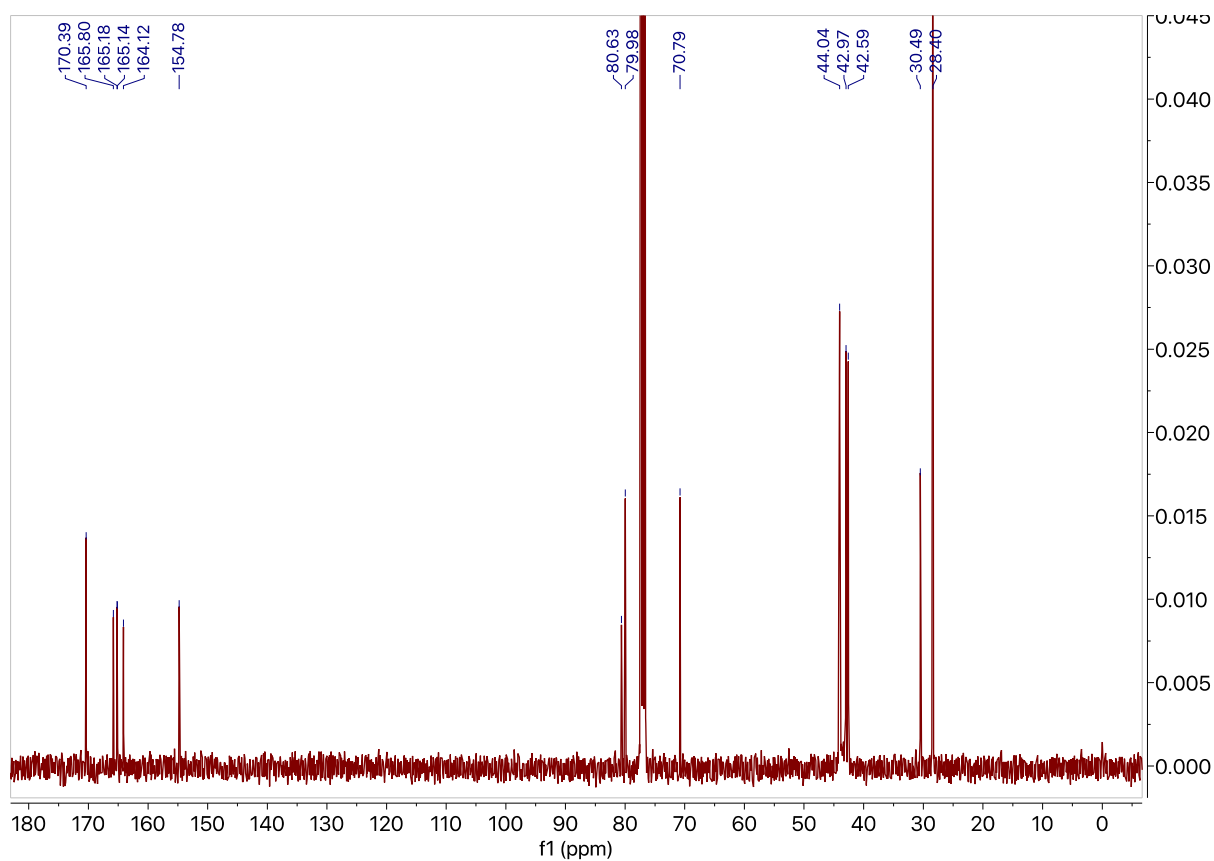

# Compound 17

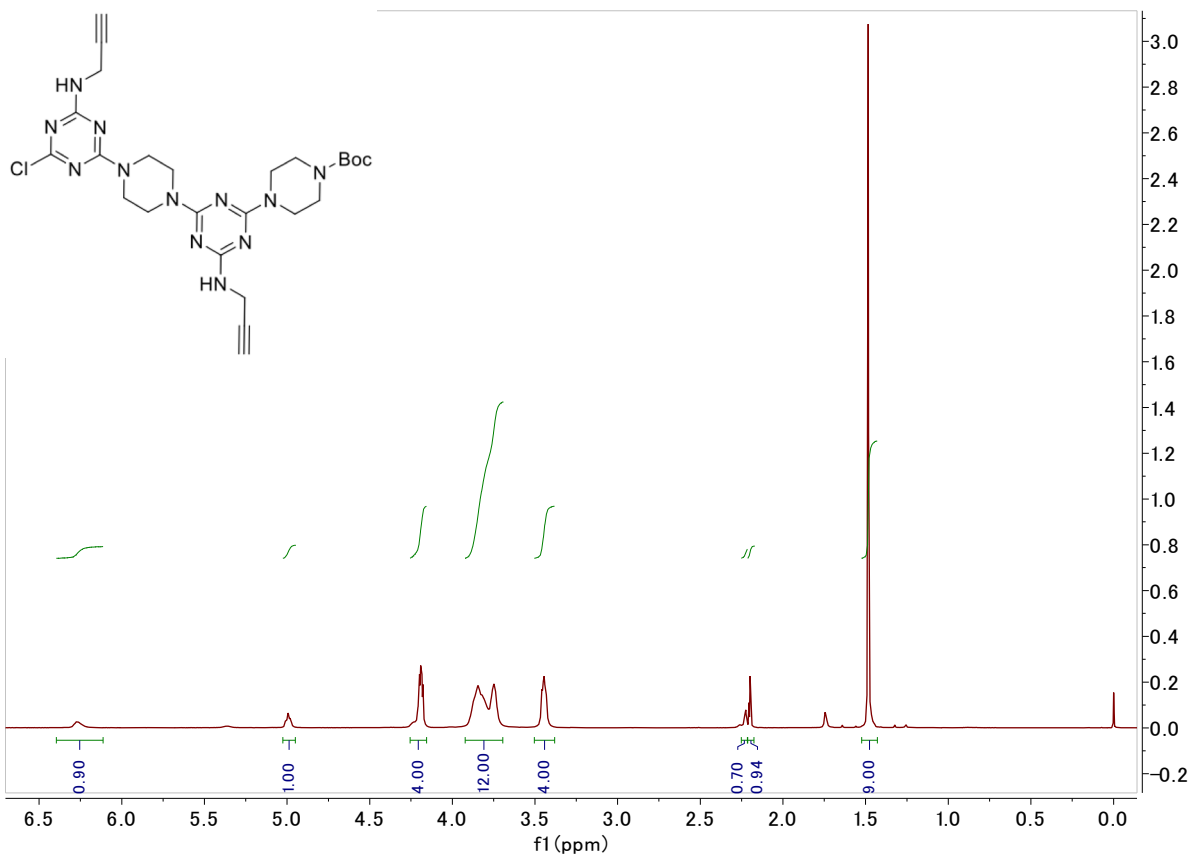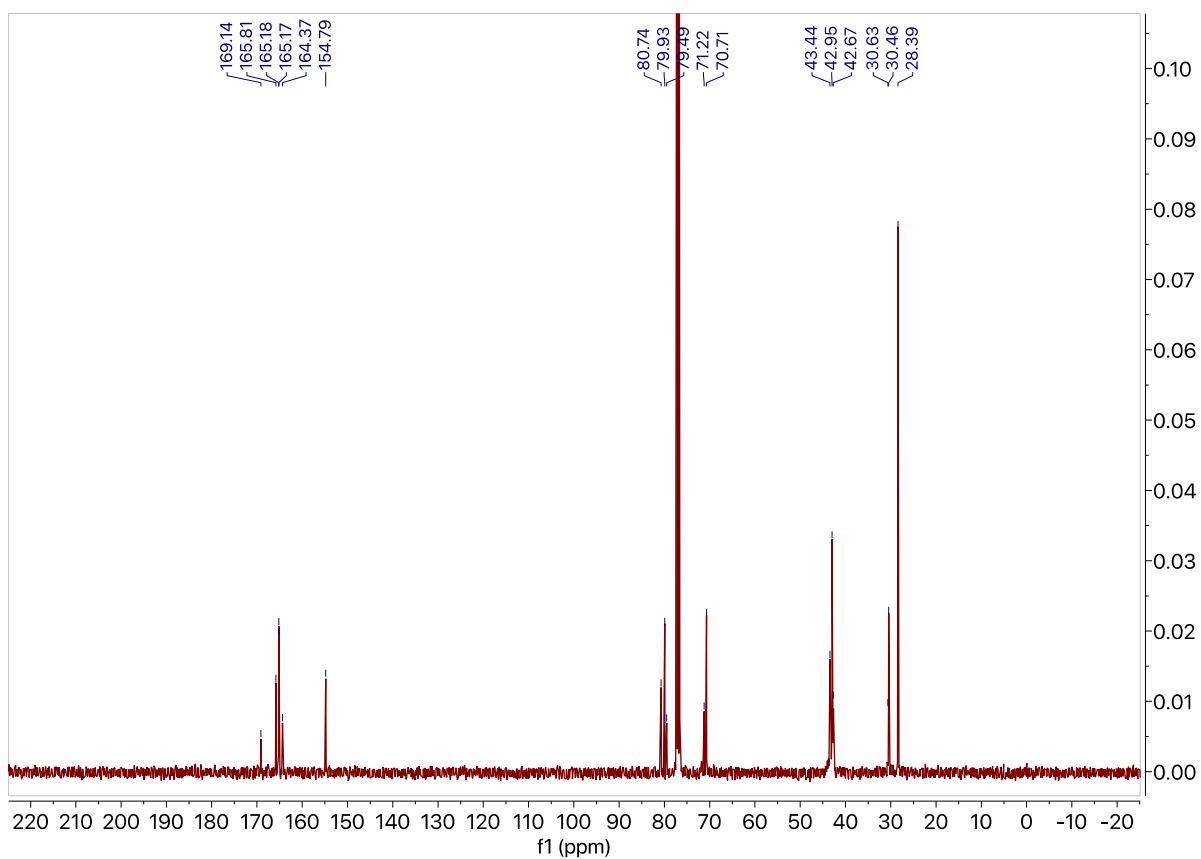



# G3 dendrimer 18

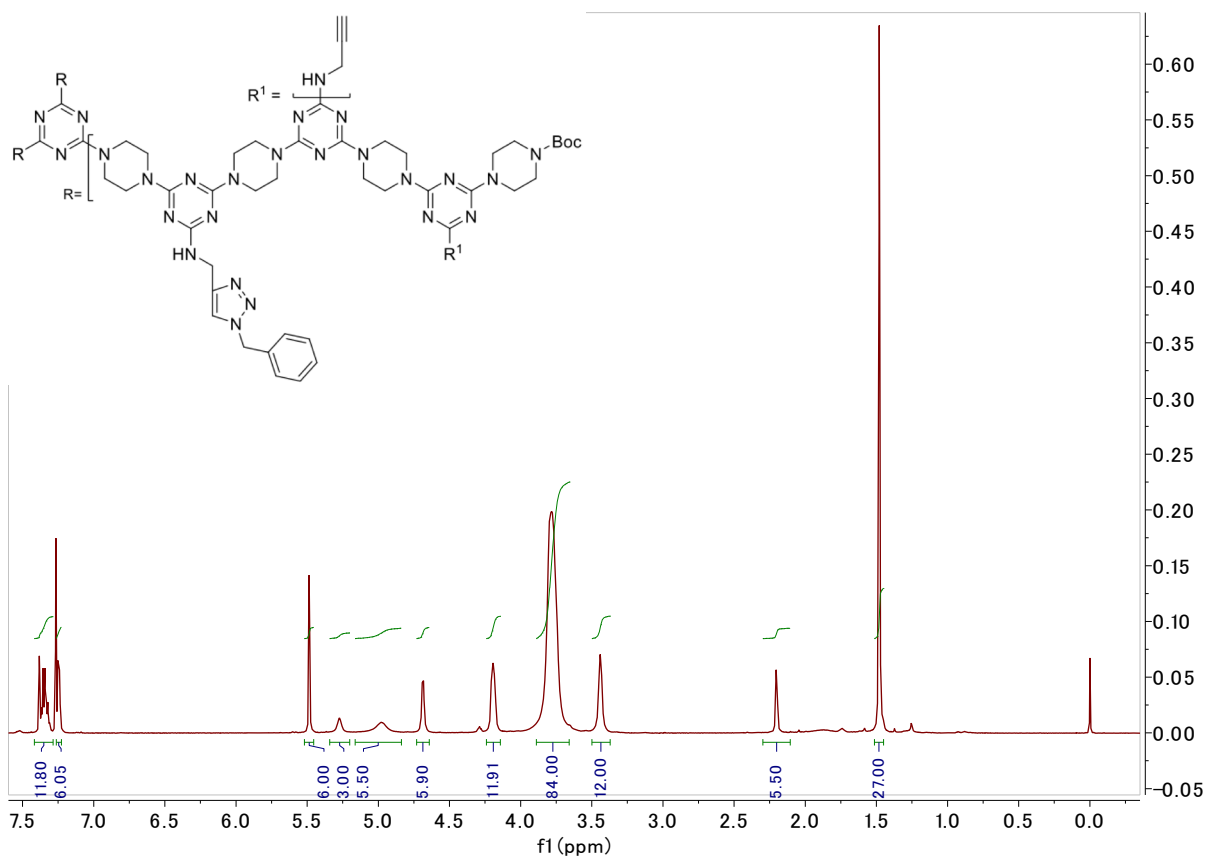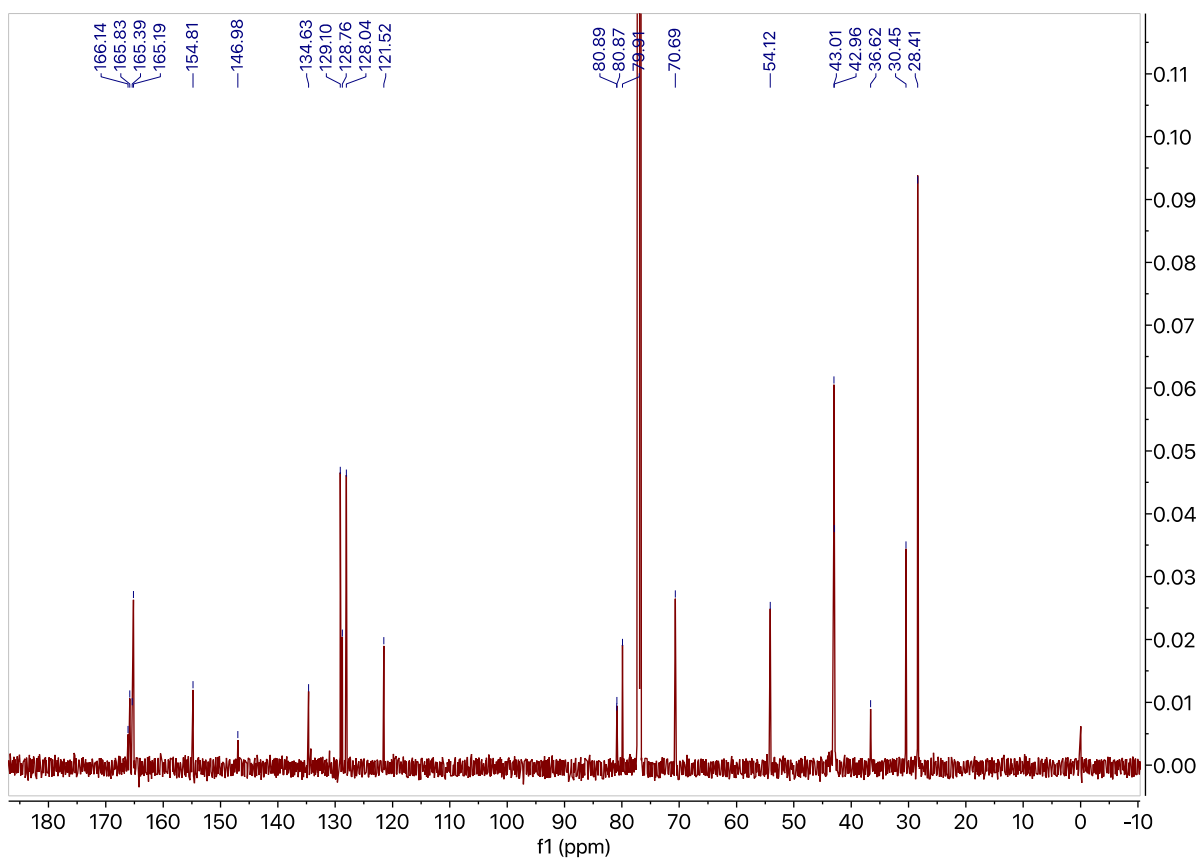

Supplement: s1 [file s1]
